# Supplementary material for: TREM2hi resident macrophages protect the septic heart by maintaining cardiomyocyte homeostasis
Source: PubMed Central journal article supplement (PMC9886554; doi:10.1038/s42255-022-00715-5), 2023-01-12
Supplement: 42255_2022_715_MOESM1_ESM.pdf [file 42255_2022_715_MOESM1_ESM.pdf]

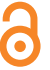

---

# TREM2<sup>hi</sup> resident macrophages protect the septic heart by maintaining cardiomyocyte homeostasis

---

In the format provided by the authors and unedited

---

**The file includes:**

**Supplementary Table 1:** List of primers used for RT-qPCR

3 **Supplementary Table 2:** List of Antibodies

**Supplementary Table 3:** List of chemicals and assays

**Video S1.** Sepsis induces the release of massively cardiomyocyte-derived exophers.

6 **Video S2.** Mac1 cells take up cardiac exophers containing mitochondria in SICM.

**Video S3.** Cardiomyocyte-derived mitochondria transfer to Mac1 cells.

**Video S4.** Cardiomyocyte-derived mitochondria processed with LAMP1<sup>+</sup>

9 phagolysosomes in Mac1 cells.

**Video S5.** *Trem2* deficiency impairs the uptake of cardiomyocyte-derived mitochondria by Mac1 subset in septic heart.

12 **Video S6.** Injected Mac1 cells take up mitochondria from cardiomyocytes in SICM.

**Supplementary Table 1: List of primers used for RT-qPCR.**

All primers are purchased from Sangon Biotech.

| <b>Gene</b>    | <b>Forward Primer (5'→3')</b> | <b>Reversed primer (5'→3')</b> |
|----------------|-------------------------------|--------------------------------|
| <i>β-actin</i> | CAGCTTCTTTGCAGCTCCTT          | GCAGCGATATCGTCATCCA            |
| <i>Trem2</i>   | TGGGTCCCCGAGGAGTCATC          | AAACTTGCTCAGGAGAACGC           |
| <i>Anp</i>     | CACAGATCTGATGGATTTCAAGA       | CCTCATCTTCTACCGGCATC           |
| <i>Bnp</i>     | GTCAGTCGTTTGGGCTGTAAC         | AGACCCAGGCAGAGTCAGAA           |
| <i>αMhc</i>    | TGCACTACGGAAACATGAAGTT        | CGATGGAATAGTACACTTGCTGT        |
| <i>βMhc</i>    | GATGTTTTTGTGCCCGATGA          | CAGTCACCGTCTTGCCATTCT          |
| <i>Il1b</i>    | CTTCCCCAGGGCATGTTAAG          | ACCCTGAGCGACCTGTCTTG           |
| <i>Il6</i>     | TTCCATCCAGTTGCCTTCTTG         | TTGGGAGTGGTATCCTCTGTGA         |
| <i>Ccl2</i>    | TAAAAACCTGGATCGGAACCAAA       | GCATTAGCTTCAGATTTACGGGT        |
| <i>Tnfa</i>    | ATGGCCTCCCTCTCATCAGT          | CTTGGTGGTTTGCTACGACG           |

**Supplementary Table 2: List of Antibodies.**

| <b>Antibodies</b>                                       | <b>Source</b>               | <b>Catalog</b> | <b>dilution</b> |
|---------------------------------------------------------|-----------------------------|----------------|-----------------|
| AF700 Rat anti-Mouse CD45 (30-F11)                      | BD Biosciences              | 560510         | 1 : 200         |
| PE-Cy5 Rat anti-Mouse CD45R/B220<br>(RA3-6B2)           | BD Biosciences              | 553091         | 1 : 200         |
| BV510 Hamster anti-Mouse CD3e<br>(145-2C11)             | BD Biosciences              | 563024         | 1 : 200         |
| BV786 Mouse anti-Mouse NK-1.1<br>(PK136)                | BD Biosciences              | 740853         | 1 : 200         |
| BV711 Rat anti-Mouse CD11b (M1/70)                      | BD Biosciences              | 563168         | 1 : 200         |
| FITC Rat anti-Mouse Ly-6G (1A8-Ly6g)                    | Thermo Fisher<br>Scientific | 11-9668-82     | 1 : 200         |
| PE Rat anti-Mouse F4/80 (BM8)                           | BioLegend                   | 123110         | 1 : 200         |
| BV650 Rat anti-Mouse I-A/I-E<br>(M5/114.15.2)           | BD Biosciences              | 563415         | 1 : 200         |
| BV605 Hamster anti-Mouse CD11c<br>(N418)                | BD Biosciences              | 744179         | 1 : 200         |
| BV421 Rat anti-Mouse Ly-6C (HK1.4)                      | BioLegend                   | 128031         | 1 : 200         |
| PerCP-Cyanine5.5 Rat anti-<br>Mouse/Human CD11b (M1/70) | BioLegend                   | 101228         | 1 : 200         |
| PE-Cyanine7 Rat anti-Mouse F4/80<br>(BM8)               | Thermo Fisher<br>Scientific | 25-4801-82     | 1 : 200         |

|                                                |                          |            |             |
|------------------------------------------------|--------------------------|------------|-------------|
| Super Bright 600 Rat anti-Mouse CD163 (TNKUPJ) | Thermo Fisher Scientific | 63-1631-82 | 1 : 200     |
| PerCP-Cy5.5 Mouse anti-Mouse CD45.1 (A20)      | BD Biosciences           | 560580     | 1 : 200     |
| BV605 Mouse anti-mouse CD45.2 (104)            | BD Biosciences           | 563051     | 1 : 200     |
| Biotinylated Rabbit anti-Murine RELM $\alpha$  | PeproTech                | 500-P214BT | 1 : 200     |
| BV421 Mouse anti-Ki-67 (B56)                   | BD Biosciences           | 565929     | 1 : 200     |
| BV421 Mouse IgG1, k Isotype Control (X40)      | BD Biosciences           | 562438     | 1 : 200     |
| Rat anti-Mouse CD68 (FA-11)                    | Abcam                    | ab53444    | 1:250       |
| Mouse anti-Mouse CD163 (ED2)                   | Santa Cruz Biotechnology | sc-58965   | 1:100       |
| Goat anti mouse TREM2 Antibody(polyclonal)     | Abcam                    | ab95470    | 1:100       |
| Rat anti Human/Mouse TREM2 (237920)            | R and D Systems          | MAB17291   | 1:100       |
| Rabbit anti-Mouse TOMM20 (ERP15581-54)         | Abcam                    | ab186735   | 1:200/1:250 |
| Rabbit anti-Cardiac Troponin I (polyclonal)    | Abcam                    | ab47003    | 1:250       |
| Rat anti-Mouse LAMP1                           | DSHB                     | P11438     | 1:50        |

|                                                                                               |                             |        |       |
|-----------------------------------------------------------------------------------------------|-----------------------------|--------|-------|
| Alexa Fluor 594 Donkey anti-Rat IgG<br>(H+L) Highly Cross-Adsorbed<br>Secondary Antibody      | Thermo Fisher<br>Scientific | A21209 | 1:500 |
| Alexa Fluor 488 Donkey anti-Mouse<br>IgG (H+L) Highly Cross-Adsorbed<br>Secondary Antibody    | Thermo Fisher<br>Scientific | A21202 | 1:500 |
| Alexa Fluor 488 Donkey anti-Rabbit<br>IgG (H+L) Highly Cross-Adsorbed<br>Secondary Antibody   | Thermo Fisher<br>Scientific | A21206 | 1:500 |
| Alexa Fluor Plus 647 Donkey anti-Rat<br>IgG (H+L) Highly Cross-Adsorbed<br>Secondary Antibody | Thermo Fisher<br>Scientific | A48272 | 1:500 |
| Alexa Fluor 594 Goat anti-Mouse IgG<br>(H+L) Cross-Adsorbed Secondary<br>Antibody             | Thermo Fisher<br>Scientific | A11005 | 1:500 |

**Supplementary Table 3: List of chemicals and assays.**

| <b>REAGENT</b>                                               | <b>Source</b>                              | <b>Catalog</b> |
|--------------------------------------------------------------|--------------------------------------------|----------------|
| FITC TUNEL Assay Kit                                         | Abcam                                      | ab66108        |
| MitoTracker™ Green FM                                        | Thermo Fisher Scientific                   | M7514          |
| CytoTracker Orange (CMTMR)                                   | Thermo Fisher Scientific                   | C2927          |
| NIR Mitochondrial Membrane Potential Assay Kit               | Abcam                                      | ab112149       |
| Liberase™ TL Research Grade                                  | Sigma-Aldrich                              | 5401020001     |
| Percoll                                                      | Yeadon                                     | 40501ES60      |
| Dnase I                                                      | Sinopharm Chemical Reagent Co.             | 64002860       |
| HEPES                                                        | Sigma-Aldrich                              | V900477        |
| Tamoxifen Citrate                                            | Meilunbio                                  | MB1233         |
| DAPI-Fluoromount-G                                           | Southern Biotech                           | 0100-20        |
| Corning® Matrigel® Basement Membrane Matrix, LDEV-free, 5 mL | Corning                                    | 356234         |
| Mouse Interleukin Array Q1                                   | Ray Biotech                                | QAM-INT-1      |
| Lactic Acid assay kit                                        | Nanjing Jiancheng Bioengineering Institute | A019-2-1       |
| Lactate dehydrogenase assay kit                              | Nanjing Jiancheng Bioengineering Institute | A020-2-2       |
| Mouse IL-1 beta Valukine ELISA                               | Novus                                      | VAL601         |
| Mouse IL-6 Valukine ELISA Kit                                | Novus                                      | VAL604         |

|                                                                            |                          |            |
|----------------------------------------------------------------------------|--------------------------|------------|
| Mouse TNF-a ELISA Kit                                                      | MULTI SCIENCES           | EK282      |
| Mouse CCL2/MCP-1 ELISA Kit                                                 | MULTI SCIENCES           | EK287      |
| ELISA Kit for Atrial Natriuretic Peptide (ANP)                             | USCN Life Science        | SEA225Mu   |
| ELISA Kit for N-Terminal Pro-Brain Natriuretic Peptide (NT-ProBNP)         | USCN Life Science        | SEA485Mu   |
| ELISA Kit for Cardiac Troponin I (cTnI)                                    | USCN Life Science        | SEA478Mu   |
| ATP Assay Kit                                                              | Beyotime                 | S0026      |
| UltraComp eBeads™ Compensation Beads                                       | Thermo Fisher Scientific | 01-2222-42 |
| eBioscience™ Foxp3 / Transcription Factor Staining Buffer Set              | Thermo Fisher Scientific | 00-5523-00 |
| Chromium Next GEM Single Cell 3' GEM, Library & Gel Bead Kit v3.1, 16 rxns | 10x Genomics             | PN-1000121 |
| Chromium Next GEM Chip G Single Cell Kit, 48rxns                           | 10x Genomics             | PN-1000120 |
| TRizol™ Reagent                                                            | Ambion                   | 15596018   |
| PrimeScript™ RT reagent Kit (Perfect Real Time)                            | Takara                   | RR037A     |
| TB Green® Premix Ex Taq™ (Tli RNaseH Plus)                                 | Takara                   | RR420A     |
| eBioscience™ Calcein Violet 450 AM Viability Dye                           | Thermo Fisher Scientific | 65-0854-39 |



|                               |                          |        |
|-------------------------------|--------------------------|--------|
| Vybrant™ DyeCycle™ Ruby Stain | Thermo Fisher Scientific | V10309 |
|-------------------------------|--------------------------|--------|

3 **Supplementary Video 1. Sepsis induces the release of massively cardiomyocyte-derived exophers.**

3D reconstruction of the heart slices from Card<sup>RED</sup> mice showed the presence of  
6 mitochondria (Tom20, cyan) in cardiomyocyte-derived exophers (red) and the accumulation of Tomato<sup>+</sup> exophers co-localized with Tom20 in septic hearts.

9 **Supplementary Video 2. Mac1 cells take up cardiac exophers containing mitochondria in SICM.**

3D reconstruction of the heart slices from Card<sup>RED</sup> mice. Mac1 cells (TREM2, green) phagocytosed cardiomyocyte-derived exophers (red). Exophers in Mac1 cells included  
12 mitochondria (Tom20, white).

**Supplementary Video 3. Cardiomyocyte-derived mitochondria transfer to Mac1 cells.**

15 3D reconstruction of the heart slices from MitoCard mice. Mac1 cells (TREM2, red) took up cardiomyocyte-derived mitochondria (mtDendra2, green).

18 **Supplementary Video 4. Cardiomyocyte-derived mitochondria processed with LAMP1<sup>+</sup> phagolysosomes in Mac1 cells.**

3D reconstruction of the heart slices from MitoCard mice. Cardiomyocyte-derived mitochondria (mtDendra2, green) phagocytosed by Mac1 cells (TREM2, red) partially localized in lysosomes (LAMP1, white).

**Supplementary Video 5. *Trem2* deficiency impairs the uptake of cardiomyocyte-derived mitochondria by Mac1 subset in septic heart.**

Part 1: Schematic illustration of the cardiomyocyte mitochondria labeled with AAV9-Tnnt2-mt-Keima virus. Keima-tagged mitochondria were indicated by different fluorescence in neutral (Keima 458nm, green) and acidic (Keima 561nm, red) environments. Part 2: 3D reconstruction showed that TREM2<sup>+</sup> macrophages (green) took up cardiomyocyte-derived mitochondria (mtKeima-458, cyan) and some mitochondria in an acidic environment (mtKeima-561, red) in the hearts of AAV9-Tnnt2-mt-Keima infected mice. Part 3: CD163<sup>+</sup> macrophages (green) took up cardiomyocyte-derived mitochondria (mtKeima-458, cyan; mtKeima-561, red) in hearts of WT and *Trem2*<sup>-/-</sup> mice infected with AAV9-Tnnt2-mt-Keima.

**Supplementary Video 6. Transplanted Mac1 cells engulf cardiomyocyte-derived mitochondria in SICM.**

3D reconstruction of the heart slices from MitoCard mice. Injected Mac1 cells (CMTMR, red) phagocytosed cardiomyocyte-derived mitochondria (mtDendra2, green).
